# Supplementary material for: Generation of full-color and switchable circularly polarized luminescence from nonchiral dyes assembled in cholesteric cellulose films
Source: Royal Society of Chemistry journal article supplement (doi:10.1039/c9tc01956a), 2019-01-01
Supplement: c9tc01956a1.pdf [file c9tc01956a1.pdf]

## Supporting Information

# **The generation of full-color and switchable circularly polarized luminescence from nonchiral dyes assembled in cholesteric cellulose films**

*Jintao He, Kaiqiang Bian, Na Li, and Guangzhe Piao\**

Key Laboratory of Rubber-Plastics, Ministry of Education/Shandong Provincial

Key Laboratory of Rubber-Plastics, Qingdao University of Science &

Technology, Qingdao 266042, China

Tel.: +86-0532-84022725; Fax: +86-532-840-22725

E-mail address: piao@qust.edu.cn (G. Piao)

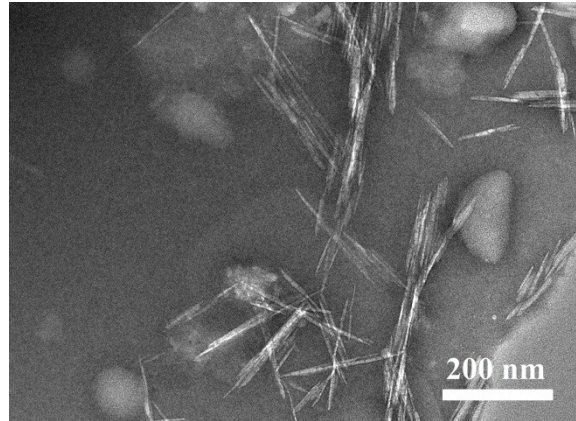

**Figure S1.** TEM image of cellulose nanocrystals.

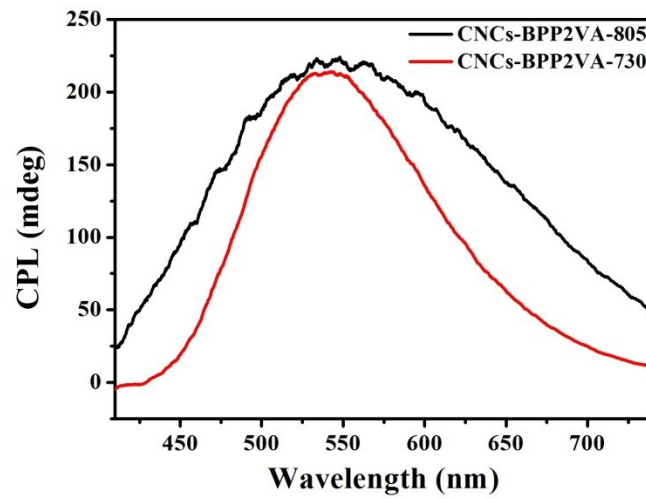

**Figure S2.** CPL spectra of CNCs-BPP2VA composite films with different helical pitch,  $\lambda_{\text{ex}} = 365$  nm.

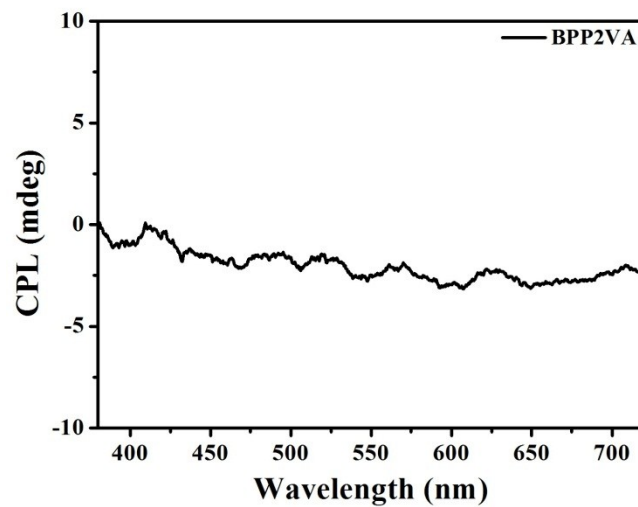

**Figure S3.** CPL spectrum of BPP2VA in THF solution excited at 365 nm.

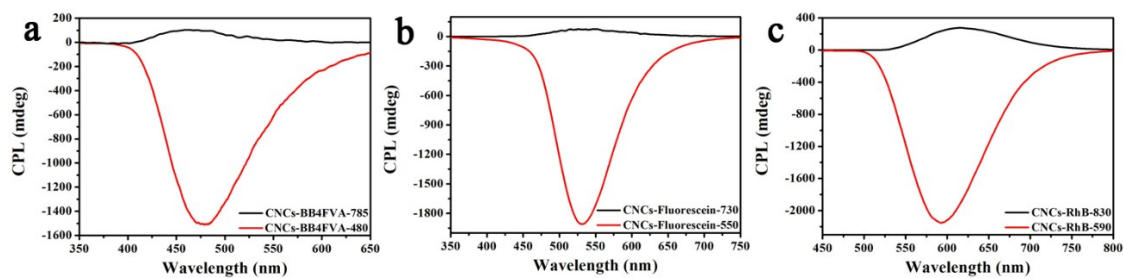

**Figure S4.** CPL spectra of (a) CNCs-BB4FVA, (b) CNCs-Fluorescein and (c) CNCs-RhB composite films.

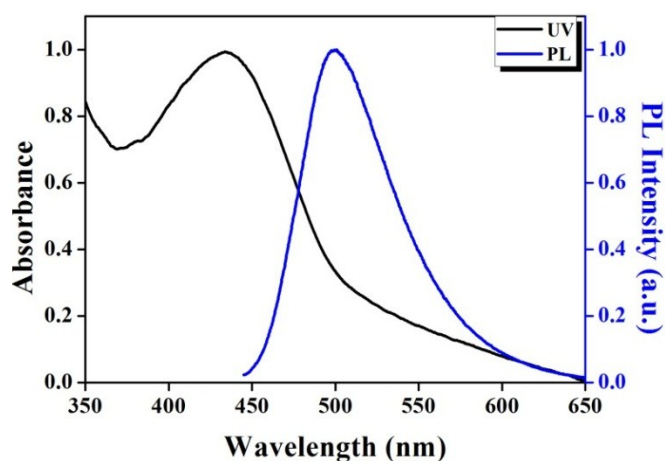

**Figure S5.** The spectra of UV-vis and PL measured from the BPP2VA in THF solution,  $\lambda_{\text{ex}} = 425$  nm.

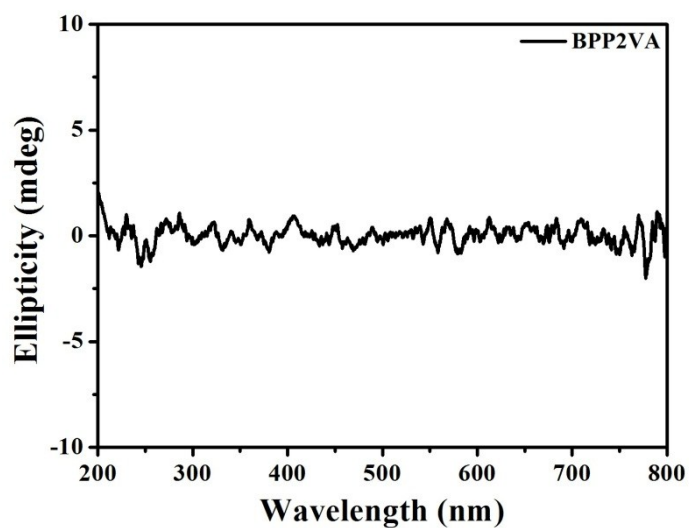

**Figure S6.** CD spectrum of BPP2VA in THF solution.

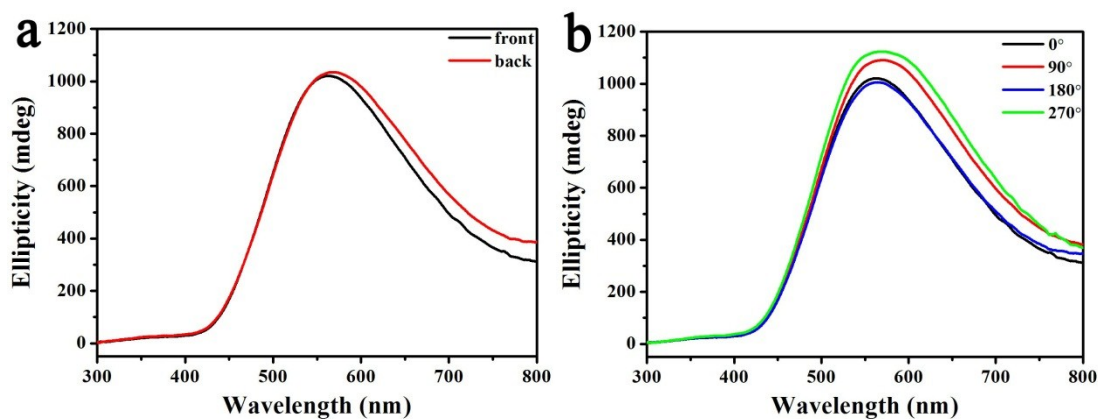

**Figure S7.** The “front-and-back” CD measurements (a) and CD spectra rotated at different angles normal to the beam path (b) of CNCs-BPP2VA composite films.

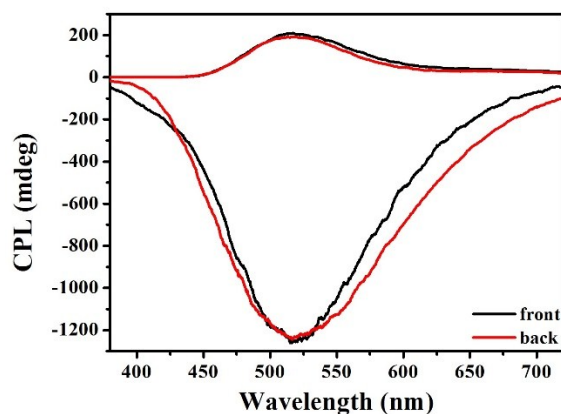

**Figure S8.** The “front-and-back” CPL spectra of CNCs-BPP2VA composite films.

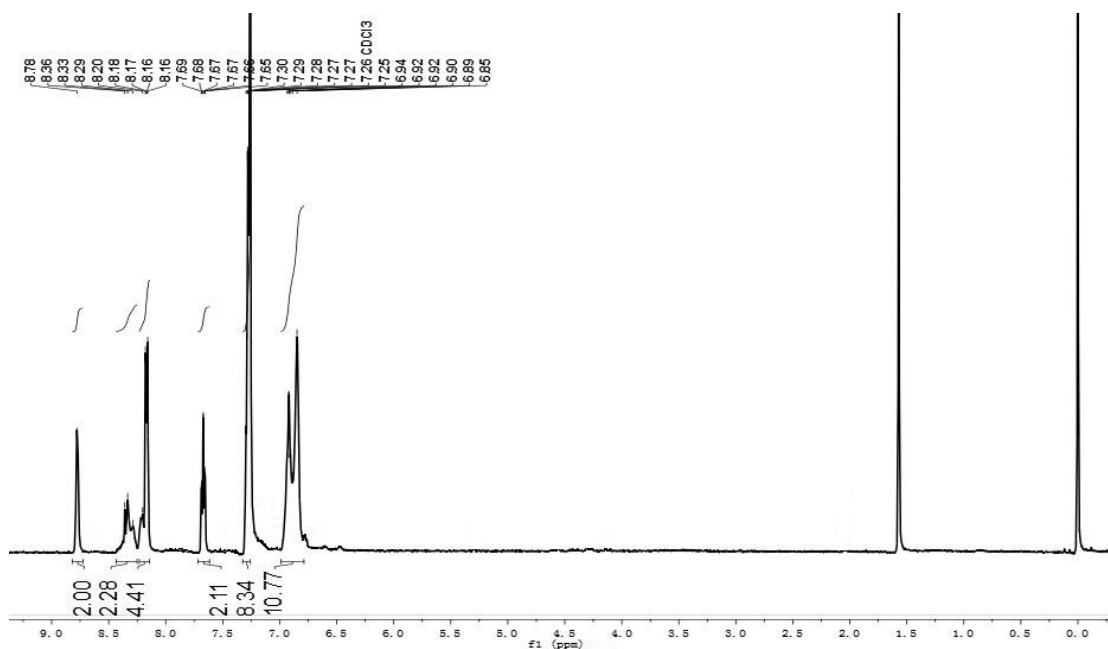

**Figure S9.**  $^1\text{H}$  NMR spectrum of BPP2VA (500 MHz,  $\text{CDCl}_3$ , TMS, 25 °C).
